# Supplementary material for: A label-free fluorescence assay for hydrogen peroxide and glucose based on the bifunctional MIL-53(Fe) nanozyme
Source: Royal Society of Chemistry journal article supplement (doi:10.1039/c7cc09819g), 2018-01-01
Supplement: c7cc09819g1.pdf [file c7cc09819g1.pdf]

## **Electronic Supplementary Information (ESI)**

### **A label-free fluorescent assay for hydrogen peroxide and glucose based on bifunctional MIL-53(Fe) nanozyme**

Tianran Lin, Yuemei Qin, Yuanlin Huang, Ruitao Yang, Li Hou and Fanggui Ye\*, Shulin Zhao

State Key Laboratory for the Chemistry and Molecular Engineering of Medicinal Resources, College of Chemistry and Pharmaceutical Science of Guangxi Normal University, Guilin 541004, P. R. China.

\*Corresponding author: Prof. Fanggui Ye

E-mail address: fangguiye@163.com

Tel: +86-773-5856104; fax: +86-773-5832294

## **1 Experimental**

### **1.1 Materials**

Iron chloride hexahydrate ( $\text{FeCl}_3 \cdot 6\text{H}_2\text{O}$ ) was purchased from Aladdin Reagent Co., Ltd. (Shanghai, China) and terephthalic acid (TA) was purchased from Tokyo Chemical Industry (Japan, Tokyo). Hydrogen peroxide ( $\text{H}_2\text{O}_2$ ), sodium dihydrogen phosphate ( $\text{NaH}_2\text{PO}_4 \cdot 12\text{H}_2\text{O}$ ), sodium dianhydride ( $\text{Na}_2\text{HPO}_4 \cdot 7\text{H}_2\text{O}$ ), ethanol and dimethylformamide (DMF) were purchased from Sinopharm Chemical Reagent Co., Ltd. (China). Glucose and Glucose Oxidase (GOx,  $100\text{U mg}^{-1}$ ) were purchased from Shanghai Sangon Biological Engineering Technology & Services Co., Ltd. (Shanghai, China). Phosphoric acid ( $\text{H}_3\text{PO}_4$ ) was obtained from Chengdu Chemical Industry Co., Ltd. (Chengdu, China). All these chemical reagents were analytical grade and used as received unless otherwise specified. Ultrapure water ( $18.2\text{ M}\Omega\cdot\text{cm}$ ) was generated by a Millipore purification system (Bedford, MA, USA) and used for preparation of all aqueous solutions.

### **1.2 Apparatus**

Powder X-ray diffraction (XRD) pattern of MIL-53(Fe) was obtained using a D/max 2550 VB/PC diffractometer (Rigaku, Japan) using Cu K $\alpha$  radiation ( $\lambda = 0.15418\text{ nm}$ ). Fourier transform infrared (FTIR) spectroscopy was achieved by spectrum-2000 (Perkin-Elmer, USA). Thermogravimetric analysis (TGA) was performed with a LABSYS evo TG-DSC/DTA instrument (Setaram Instrumentation, France). Scanning electron microscopy (SEM) images were recorded on a NovaTM NanoSEM 430 (FEI, USA). Fluorescence spectra and emission intensity were recorded on an RF-5031PC luminescence spectrometer (Shimadzu, Japan). The emission spectra at 314 nm excitation wavelength were used for analysis. Excitation spectra were recorded by observing the emission intensity of MIL-53(Fe) at 440 nm.

### **1.3 Synthesis of MIL-53(Fe)**

MIL-53(Fe) was synthesized by a solvothermal method according to the literature with a minor modification (Chem. Mater., 2010, 22, 4237-4245).

Typically, 1.09g  $\text{FeCl}_3 \cdot 6\text{H}_2\text{O}$  was dissolved in 20 mL DMF solution, and 0.67g TA was added. The solution was stirred vigorously for 10 min, and then transfer to a 50 mL Teflon-lined stainless-steel autoclave. The autoclave was heated at  $150^\circ\text{C}$  for 48 h. After natural cooling, the yellow precipitate was collected by centrifugation and washed with distilled water and ethanol several times. Finally, the yellow precipitate was dried at  $60^\circ\text{C}$  for 24 h under vacuum. A yellow powder was obtained with a mass of 0.43 g.

#### **1.4 Detection of $\text{H}_2\text{O}_2$ and glucose using MIL-53(Fe) as sensing platform**

$\text{H}_2\text{O}_2$  detection was carried out as follows: 120  $\mu\text{L}$  MIL-53(Fe) ( $500 \text{ mg L}^{-1}$ ) and 780  $\mu\text{L}$  phosphate buffer (PB) buffer ( $200 \text{ mmol L}^{-1}$ , pH 4.0) were mixed. Then 100  $\mu\text{L}$   $\text{H}_2\text{O}_2$  with different concentration was added and the mixture was further incubated at  $65^\circ\text{C}$  for 70 min. A RF-5031PC luminescence spectrometer was used for analysis of the solutions, and the corresponding emitting spectra were obtained.

Glucose detection was realized as follows: 200  $\mu\text{L}$  GOx ( $1 \text{ mg mL}^{-1}$ ) was mixed with 200  $\mu\text{L}$  glucose solution with different concentrations and the mixture was incubated at  $37^\circ\text{C}$  for 30 min to produce  $\text{H}_2\text{O}_2$ . Then, 100  $\mu\text{L}$  of the mixture, 120  $\mu\text{L}$  MIL-53(Fe) ( $500 \text{ mg L}^{-1}$ ) and 780  $\mu\text{L}$  PB buffer ( $200 \text{ mmol L}^{-1}$ , pH 4.0) were mixed and further incubated at  $65^\circ\text{C}$  for 70 min. The corresponding emitting spectra of the solutions were recorded and used for analysis.

Before the detection of glucose in serum samples, the proteins in serum samples were removed by precipitation. 30  $\mu\text{L}$  of serum sample was diluted with 20  $\mu\text{L}$  water, and then 500  $\mu\text{L}$   $\text{Ba}(\text{OH})_2$  ( $0.08 \text{ mmol L}^{-1}$ ) and 500  $\mu\text{L}$   $\text{ZnSO}_4$  ( $0.10 \text{ mmol L}^{-1}$ ) were added and blended. The mixture was centrifugated at 8000 rpm for 10 min. The other detection procedure was the same as that of glucose detection.

To further verify the accuracy and precision of glucose concentration obtained by this method, a standard addition method was used, and the serum samples were prepared as follows: 30  $\mu\text{L}$  of serum sample was mixed

with 20  $\mu\text{L}$  different concentrations of glucose solution. Then, 500  $\mu\text{L}$   $\text{Ba}(\text{OH})_2$  ( $0.08 \text{ mmol L}^{-1}$ ) and 500  $\mu\text{L}$   $\text{ZnSO}_4$  ( $0.10 \text{ mmol L}^{-1}$ ) were added and blended. The mixture was centrifugated at 8000 rpm for 10 min. The other detection procedure was the same as that of serum glucose detection.

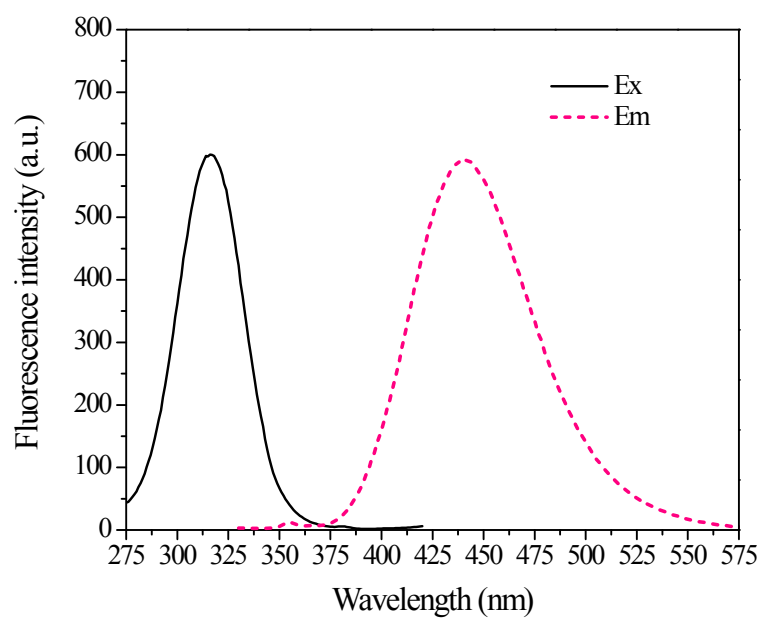

Fig. S1. Excitation (Ex) and emission (Em) spectra of MIL-53 (Fe)/H<sub>2</sub>O<sub>2</sub> system. The concentrations of MIL-53(Fe) and H<sub>2</sub>O<sub>2</sub> were 60 mg L<sup>-1</sup> and 15 μmol L<sup>-1</sup>, respectively.

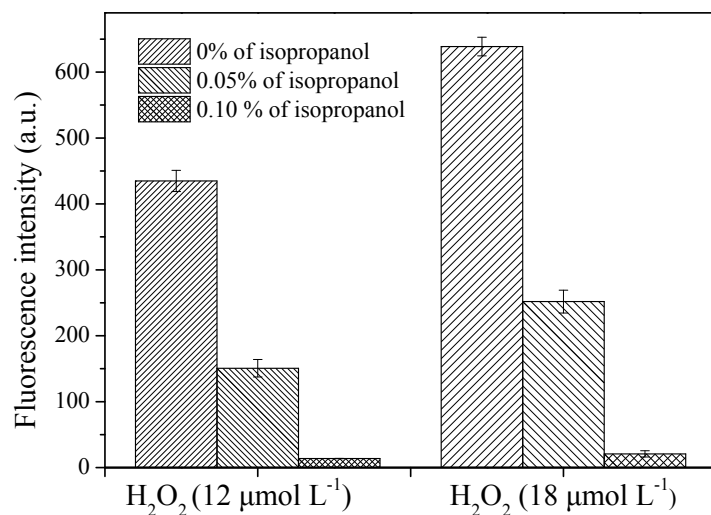

Fig. S2. The catalytic oxidation of MIL-53(Fe) by H<sub>2</sub>O<sub>2</sub> at the presence of different concentration of isopropanol. Procedures: 780 μL PB buffers (0.2 mol L<sup>-1</sup>, pH 4.0) with different concentration of isopropanol was mixed with 120 μL MIL-53 (Fe) (500 mg L<sup>-1</sup>) and 100 μL H<sub>2</sub>O<sub>2</sub> (120 μmol L<sup>-1</sup> and 180 μmol L<sup>-1</sup>). The mixture was incubated under 65°C for 70 min and then the fluorescence intensities at 440nm were recorded. The error bars represent the standard deviation of three measurements.

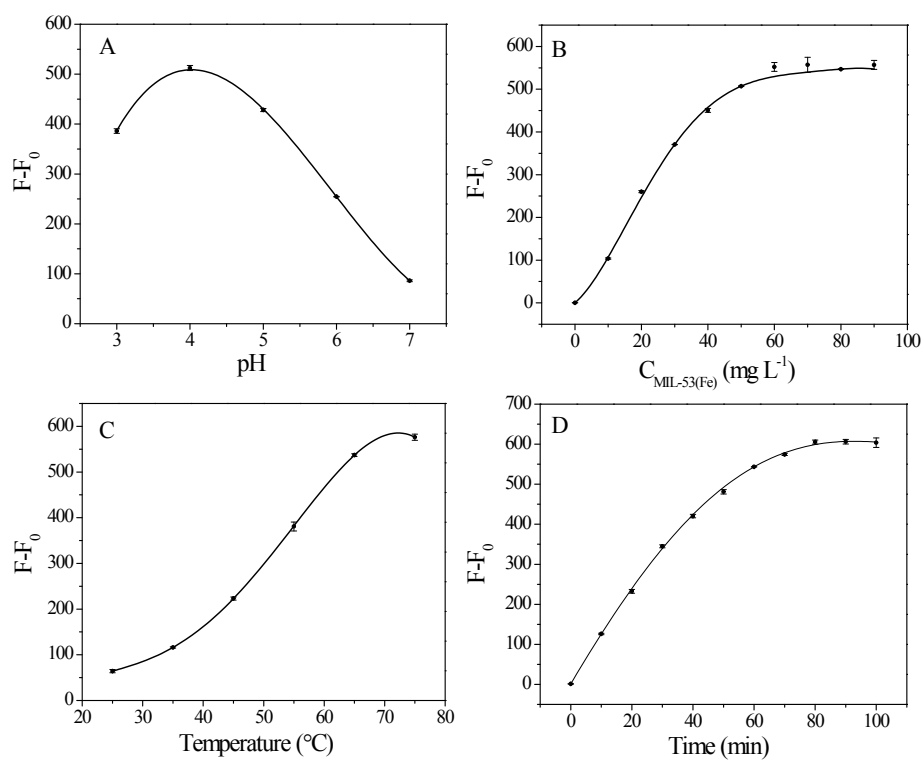

Fig. S3. Effect of (A) pH, (B) MIL-53(Fe) concentrations, (C) reaction temperature and (D) reaction time on the MIL-53(Fe) system for the  $H_2O_2$  detection. The error bars represent the standard deviation of three measurements.

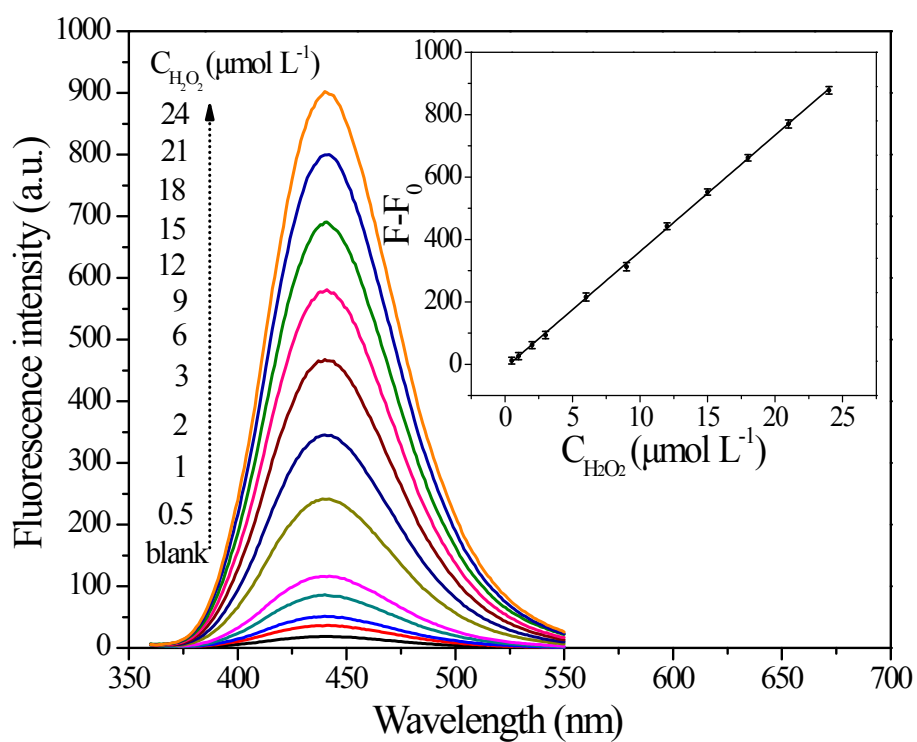

Fig. S4 (A) Fluorescent determination of H<sub>2</sub>O<sub>2</sub> based on bifunctional MIL-53(Fe). Inset is the linear calibration plot for H<sub>2</sub>O<sub>2</sub>. The error bars represent the standard deviation of three measurements.



Table S1. Sensitivity comparison for glucose detection using nanomaterials

| Nanomaterials                                                   | Method          | Limit of detection ( $\mu\text{mol L}^{-1}$ ) | Reference |
|-----------------------------------------------------------------|-----------------|-----------------------------------------------|-----------|
| Fe <sub>3</sub> O <sub>4</sub> magnetic nanoparticles           | colorimetric    | 30                                            | S1        |
| Graphene Oxide                                                  | colorimetric    | 1.0                                           | S2        |
| Carbon nanodots                                                 | colorimetric    | 0.4                                           | S3        |
| Co <sub>3</sub> O <sub>4</sub> nanoparticles                    | colorimetric    | 5.0                                           | S4        |
| Pt Nanoclusters                                                 | colorimetric    | 0.28                                          | S5        |
| mZIF-8@GOx                                                      | colorimetric    | 1.9                                           | S6        |
| MoS <sub>2</sub> nanosheets                                     | colorimetric    | 1.2                                           | S7        |
| Fe-MIL-88NH <sub>2</sub>                                        | colorimetric    | 0.48                                          | S8        |
| MIL-53(Fe)                                                      | colorimetric    | 0.25                                          | S9        |
| Fe-MIL-101 MOF                                                  | colorimetric    | 2.5                                           | S10       |
| Au NPs/Cu-TCPP(Fe)                                              | colorimetric    | 8.5                                           | S11       |
| copper metal–organic polyhedra                                  | colorimetric    | 1.5                                           | S12       |
| Fe-Co bimetallic alloy nanoparticles                            | colorimetric    | 0.01                                          | S13       |
| ZnFe <sub>2</sub> O <sub>4</sub> magnetic nanoparticles         | colorimetric    | 0.3                                           | S14       |
| ZnFe <sub>2</sub> O <sub>4</sub> decorated ZnO heterostructures | colorimetric    | 0.4                                           | S15       |
| carbon nitride dots                                             | colorimetric    | 0.5                                           | S16       |
| g-C <sub>3</sub> N <sub>4</sub> nanosheets                      | colorimetric    | 1.0                                           | S17       |
| TiO <sub>2</sub> nanotubes                                      | electrochemical | 5                                             | S18       |
| g-C <sub>3</sub> N <sub>4</sub> nanosheets                      | electrochemical | 11                                            | S19       |
| GOx/PDA/ZIF-8@rGO/GCE                                           | electrochemical | 0.333                                         | S20       |
| Graphitic Carbon Nitride Nanosheets                             | fluorescent     | 0.4                                           | S21       |
| Lanthanide coordination polymer nanoparticles                   | fluorescent     | 0.065                                         | S22       |
| MIL-53(Fe)                                                      | fluorescent     | 0.00844                                       | This work |

S1. Wei, H., Wang, E., 2008. *Anal. Chem.* 80, 2250-2254.

S2. Song, Y., Qu, K., Zhao, C., Ren, J., Qu, X., 2010. *Adv. Mater.* 22(19), 2206-2210.

S3. Shi, W., Wang, Q., Long, Y., Cheng, Z., Chen, S., Zheng, H., Huang, Y., 2011. *Chem. Commun.* 47(23), 6695-6697.

S4. Mu, J., Wang, Y., Zhao, M., Zhang, L., 2012. *Chem. Commun.* 48(19), 2540-2542.

S5. Jin, L., Meng, Z., Zhang, Y., Cai, S., Zhang, Z., Li, C., Shang, L., Shen, Y., 2017. *ACS Appl. Mater. Interfaces* 9(11), 10027-10033.

- S6. Hou, C., Wang, Y., Ding, Q., Jiang, L., Li, M., Zhu, W., Pan, D., Zhu, H., Liu, M., 2015. *Nanoscale* 7(44), 18770-18779.
- S7. Lin, T., Zhong, L., Guo, L., Fu, F., Chen, G., 2014. *Nanoscale* 6(20), 11856-11862.
- S8. Liu, Y.L., Zhao, X.J., Yang, X.X., Li, Y.F., 2013. *Analyst* 138(16), 4526-4531.
- S9. Dong, W., Liu, X., Shi, W., & Huang, Y. 2015. *Rsc Adv.* 5(23), 17451-17457.
- S10. Ortiz-Gómez, I., Salinas-Castillo, A., García, A. G., Álvarez-Bermejo, J. A., de Orbe-Payá, I., Rodríguez-Diéguez, A., & Capitán-Vallvey, L. F. 2018. *Microchim. Acta*, 185(1), 47.
- S11. Ying, H., Zhao, M., Han, S., Lai, Z., Jian, Y., & Tan, C., et al. 2017. *Adv. Mater.* 29(32).
- S12. Qin, Y., Zhang, Q., Li, Y., Liu, X., Lu, Z., & Zheng, L., et al. 2017. *J. Mater. Chem. B* 5,9365-9370.
- S13. Lien, C.-W., Huang, C.-C., Chang, H.-T., 2012. *Chem. Commun.* 48(64), 7952-7954.
- S14. Su, L., Feng, J., Zhou, X., Ren, C., Li, H., Chen, X., 2012. *Anal. Chem.* 84(13), 5753-5758.
- S15. Zhao, M., Huang, J., Zhou, Y., Pan, X., He, H., Ye, Z., Pan, X., 2013. *Chem. Commun.* 49(69), 7656-7658.
- S16. Liu, S., Tian, J., Wang, L., Luo, Y., Sun, X., 2012. *Rsc Adv.* 2(2), 411-413.
- S17. Lin, T., Zhong, L., Wang, J., Guo, L., Wu, H., Guo, Q., Fu, F.F., Chen, G., 2014. *Biosens. Bioelectron.* 59, 89-93.
- S18. Zhang, L., Han, L., Hu, P., Wang, L., Dong, S., 2013. *Chem. Commun.* 49(89), 10480-10482.
- S19. Tian, J., Liu, Q., Ge, C., Xing, Z., Asiri, A.M., Al-Youbi, A.O., Sun, X., 2013. *Nanoscale* 5(19), 8921-8924.
- S20. Wang, Y., Hou, C., Zhang, Y., He, F., Liu, M., Li, X., 2016. *J. Mater. Chem. B* 4(21), 3695-3702.
- S21. Liu, J.-W., Luo, Y., Wang, Y.-M., Duan, L.-Y., Jiang, J.-H., Yu, R.-Q., 2016. *ACS Appl. Mater. Interfaces* 8(49), 33439-33445.
- S22. Zeng, H.-H., Qiu, W.-B., Zhang, L., Liang, R.-P., Qiu, J.-D., 2016. *Anal. Chem.* 88(12), 6342-6348.

Table S2 Results of determination of glucose in serum samples

| Samples <sup>a</sup> | Conventional enzymatic method <sup>b</sup> (mmol L <sup>-1</sup> ) | Proposed method (mmol L <sup>-1</sup> ) Mean <sup>c</sup> ± SD <sup>d</sup> | Recovery (%) | RSD (%) |
|----------------------|--------------------------------------------------------------------|-----------------------------------------------------------------------------|--------------|---------|
| Sample 1             | 4.48                                                               | 4.13±0.10                                                                   | 92.2         | 2.4     |
| Sample 2             | 5.05                                                               | 4.92±0.05                                                                   | 97.4         | 1.0     |
| Sample 3             | 5.67                                                               | 5.90±0.20                                                                   | 104          | 3.4     |
| Sample 4             | 6.96                                                               | 6.65±0.17                                                                   | 95.5         | 2.6     |
| Sample 5             | 7.66                                                               | 7.73±0.01                                                                   | 101          | 0.13    |
| Sample 6             | 8.02                                                               | 8.57±0.09                                                                   | 107          | 1.1     |
| Sample 7             | 16.96                                                              | 17.44±0.14                                                                  | 103          | 0.80    |

<sup>a</sup> The serum samples were obtained from the Guilin Hospital of Chinese Traditional and Western Medicine.

<sup>b</sup> The glucose determination was performed by the conventional enzymatic method at the Guilin Hospital of Chinese Traditional and Western Medicine.

<sup>c</sup> n=3

<sup>d</sup> SD: Standard Deviation

Table S3 Results of determination of glucose in serum samples by using a standard addition method.

| Sample <sup>a</sup> | Conventional enzymatic method <sup>b</sup><br>(mmol L <sup>-1</sup> ) | Added<br>(mmol L <sup>-1</sup> ) | Proposed method<br>(mmol L <sup>-1</sup> )<br>Mean <sup>c</sup> ± SD <sup>d</sup> | Recovery (%) | RSD (%) |
|---------------------|-----------------------------------------------------------------------|----------------------------------|-----------------------------------------------------------------------------------|--------------|---------|
| Sample 1            | 4.48                                                                  | 0.35                             | 4.48±0.09                                                                         | 92.8         | 2.0     |
|                     |                                                                       | 0.70                             | 4.87±0.07                                                                         | 94.0         | 1.4     |
|                     |                                                                       | 1.4                              | 5.60±0.09                                                                         | 95.2         | 1.6     |
|                     |                                                                       | 2.1                              | 6.10±0.06                                                                         | 92.7         | 0.98    |
|                     |                                                                       | 2.8                              | 6.85±0.10                                                                         | 94.1         | 1.5     |
|                     |                                                                       | 3.5                              | 7.59±0.16                                                                         | 95.1         | 2.1     |
|                     |                                                                       | 4.2                              | 8.39±0.04                                                                         | 96.7         | 0.48    |
|                     |                                                                       | 4.9                              | 9.35±0.03                                                                         | 99.7         | 0.32    |
|                     |                                                                       | 5.6                              | 9.83±0.05                                                                         | 97.5         | 0.51    |
|                     |                                                                       | 7.0                              | 11.30±0.07                                                                        | 98.4         | 0.62    |
| 8.4                 | 12.06±0.28                                                            | 93.6                             | 2.3                                                                               |              |         |
| 9.8                 | 13.43±0.19                                                            | 94.0                             | 1.4                                                                               |              |         |
| 11.2                | 15.75±0.30                                                            | 100                              | 1.9                                                                               |              |         |

<sup>a</sup> The serum samples were obtained from the Guilin Hospital of Chinese Traditional and Western Medicine.

<sup>b</sup> The glucose determination was performed by the conventional enzymatic method at the Guilin Hospital of Chinese Traditional and Western Medicine.

<sup>c</sup> n=3

<sup>d</sup> SD: Standard Deviation
